# Supplementary material
Source: PubMed Central journal article supplement (PMC2443690)
Supplement: NIHMS46214-supplement-01.pdf [file NIHMS46214-supplement-01.pdf]

Supplemental Figure 1.

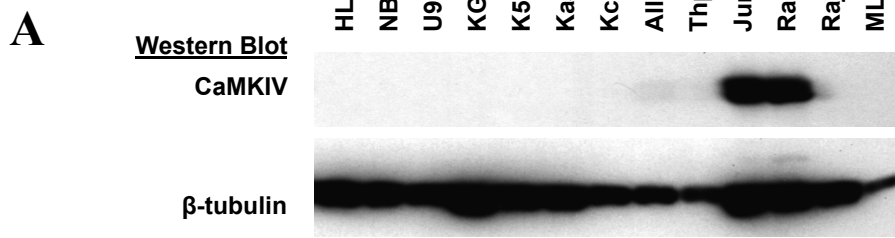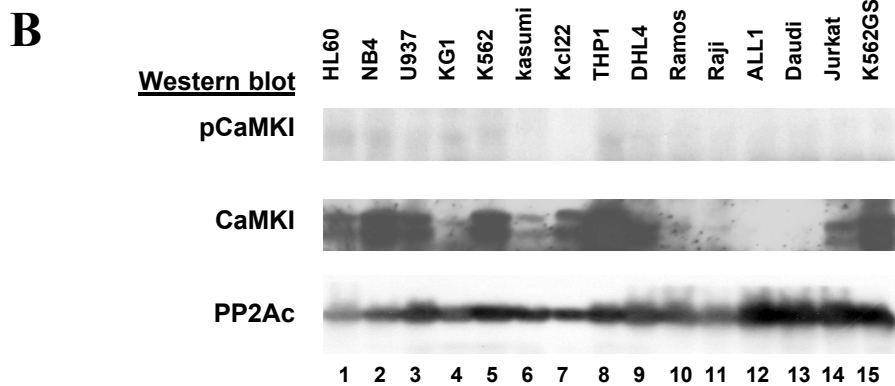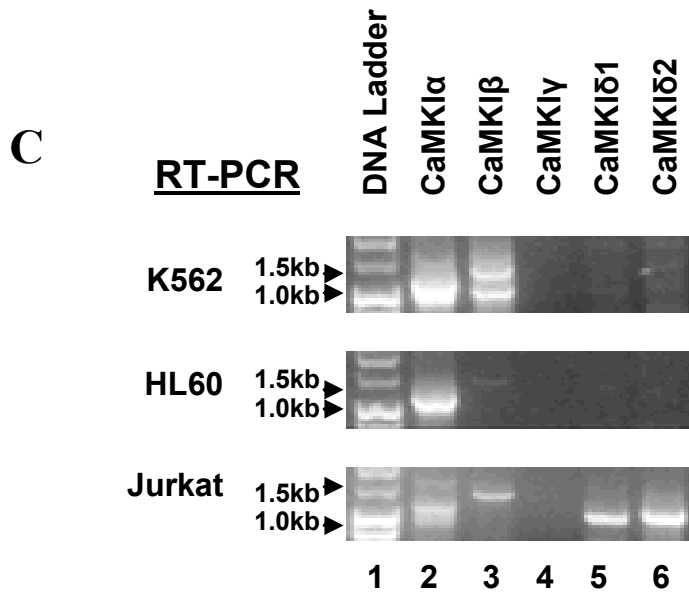

**Supplemental Figure 1.** (A,B) Western blots were performed on cell lysates from the indicated cell lines utilizing the indicated antibodies. (C) RT-PCR was performed on RNA from the indicated cell lines. The experimental protocol together with the primer sequences are available on request.
